# Supplementary material for: Risk for Clinical Venous Thromboembolism and Major Bleeding after Surgery for Lumbar Spinal Stenosis: A Retrospective Matched Register-based Cohort Study with 462,533 Individuals
Source: Research Square preprint supplement (doi:10.21203/rs.3.rs-8679027/v1), 2026-01-30
Supplement: Supplementary file 1 [file bd85c46c94b658f9304d7bb0.docx]

**Supplementary Table 2. Adjusted risk for venous thromboembolism and major bleeding during the first year after surgery for lumbar spinal stenosis stratified by sex, presented as hazard ratios (HR) with 95% confidence interval.**

|  |  | 0–30 days |  |  | 31–60 days |  |  | 61-90 days |  |  | 91-365 days |  |  |
| --- | --- | --- | --- | --- | --- | --- | --- | --- | --- | --- | --- | --- | --- |
|  |  | ***Patients*** | ***Referents*** | ***HR (95% CI)*** | ***Patients*** | ***Referents*** | ***HR (95% CI)*** | ***Patients*** | ***Referents*** | ***HR (95% CI)*** | ***Patients*** | ***Referents*** | ***HR (95% CI)*** |
| Male | VTE* | 93 | 116 | 3.93  (2.99-5.17) | 36 | 85 | 2.16  (1.46-3.19) | 28 | 102 | 1.36  (0.90-2.07) | 173 | 791 | 1.08  (0.92-1.27) |
|  | POBC** | 458 | 518 | 4.04  (3.68-4.43) | 95 | 404 | 1.08  (0.92-1.27) | 121 | 349 | 1.61  (1.39-1.87) | 685 | 2,948 | 1.09  (1.03-1.15) |
| Female | VTE* | 88 | 130 | 3.46  (2.64-4.53) | 44 | 115 | 1.95  (1.38-2.77) | 20 | 90 | 1.12  (0.69-1.81) | 182 | 732 | 1.25  (1.06-1.47) |
|  | POBC** | 398 | 444 | 4.01  (3.65-4.40) | 99 | 360 | 1.24  (1.05-1.45) | 104 | 348 | 1.33  (1.14-1.54) | 780 | 2,881 | 1.24  (1.17-1.32) |

* The models were adjusted for age, region, index year, history of VTE or cancer, diabetes, use of medications associated with an increased risk of thrombosis, and anticoagulant medication.

** The models were adjusted for for age, region, index year, history of major bleeding or cancer, stroke, hypertension, liver disease, renal failure, use of anticoagulant medications, medicine associated with an increased risk of bleeding,
