# Supplementary material for: Risk for Clinical Venous Thromboembolism and Major Bleeding after Surgery for Lumbar Spinal Stenosis: A Retrospective Matched Register-based Cohort Study with 462,533 Individuals
Source: Research Square preprint supplement (doi:10.21203/rs.3.rs-8679027/v1), 2026-01-30
Supplement: Supplementary file 2 [file f1b55c4724ac5a15f22751c1.docx]

**Supplementary Table 1. Primary outcomes and covariates of the adjusted Cox regression models defined according to the International Classification of Diseases (ICD-10), treatment code, or Anatomical Therapeutic Chemical (ATC) code collected from the National Patient Register (NPR), the Swedish National Spine Register (Swespine), the National Prescribed Drug Register (NPDR) and the Swedish National Stroke Register (Riksstroke).**

| **Outcome** | **ICD-10 code** |
| --- | --- |
| ***Venous thromboembolism*** |  |
| Pulmonary embolism | I26 |
| Deep vein thrombosis | I80.1, I80.2, I80.8, I81, I82.0, I82.2, I82.3, I82.8, I82.9 |
| ***Major bleeding*** |  |
| Intracranial bleeding | S06.4, S06.5, S06.6, I60*, I61*, I62* |
| Gastrointestinal bleeding | I85.0, I98.3, K22.6, K25.0, K25.2, K25.4, K25.6, K26.0, K26.2, K26.4, K26.6, K27.0, K27.2, K27.4, K27.6, K28.0, K28.2, K28.4, K28.6, K62.5, K66.1, K92.0-K92.2 |
| Other bleeding | H31.3, H35.6, H43.1, H45.0, I31.2, I60, I61, I62, J94.2, M25.0, N50.1A N93.9, N95.0, R04, R31.9, R58, T81.0, D62.9 |
| Reoperation due to bleeding in the spinal column | NAW79, NAW89, 101** |
| **Covariates** |  |
| ***Cardiovascular diseases*** |  |
| Atrial fibrillation | I48 |
| Hypertension | I10-I13, I15 |
| Ischemic heart disease | I20-I23, I24.1, I24.8, I24.9, I25.1, I25.2, I25.5, I25.6, I25.8, I25.9 |
| Myocardial infarction | I21, I22, I24, I25.2 |
| Vascular disease | I21, I22, I25.2, I70-I73, I65 |
| Heart failure | I11.0, I13.0, I13.2, I50 |
| ***Cerebral disease*** |  |
| Stroke | I60, I61*, I62*, I63*, I64 |
| Hemorragisk stroke | I60, I61*, I62* |
| Ischemisk stroke | I63* |
| Transient ischemic attack (TIA) | G45 except G45.4 |
| ***Other diseases*** |  |
| Anemia | D50, D51.0, D51.3, D51.8, D51.9, D52, D53, D55-D56.2, D56.8-D57.2, D58.8-D64 |
| Cancer | C00-C26, C30-C41, C43-C58, C60-C97 |
| Chronic obstructive pulmonary disease | J43-44 |
| Diabetes | E10-14 |
| Alcohol overconsumption | E24.4, F10, G31.2, G62.1, G72.1, I42.6, K29.2, K70, T51, Y90, Y91, K86.0, O35.4, Z71.4 |
| Liver failure | K70-77, JJB***, JJC*** |
| Kidney failure | I12.0, I13.1, 13.2, N17-19, DR016***, DR024***, KAS00***, KAS10***, KAS20*** |
| ***Type of spinal stenosis***** |  |
| Central spinal stenosis | 2, 13 |
| Lateral spinal stenosis | 3, 17, 21 |
| ***Medication******* |  |
| Hormone therapy | G03 |
| Antikoagulantia | B01A |
| Selective Serotonin Reuptake Inhibitor (SSRI) | N06AB |
| Corticosteroid | H02 |
| Non-Steroidal Anti-Inflammatory Drugs (NSAID) | M01A |
| Diabetes medication | A10 |

*Code additionally collected from Riksstroke

**Code collected from Swespine

***Treatment code collected from NPR

****Anatomical Therapeutic Chemical (ATC) code collected from the NPDR
